# Supplementary material for: Principles of self-organization in biological pathways: a hypothesis on the autogenous association of alpha-synuclein
Source: PubMed Central journal article supplement (PMC3905859; doi:10.1093/nar/gkt794), 2013-09-03
Supplement: supp_gkt794_nar-01976-n-2013-File008.pdf [file supp_gkt794_nar-01976-n-2013-File008.pdf]

Supplementary Information of

**Principles of Self-Organization in Biological Pathways: A Hypothesis on the Autogenous Association of Alpha-Synuclein**

Andreas Zanzoni, Domenica Marchese, Federico Agostini, Benedetta Bolognesi, Davide Cirillo, Maria Teresa Botta-Orfila, Carmen Maria Livi, Silvia Rodriguez-Mulero and Gian Gaetano Tartaglia

## Supplementary Tables

|                 | Pathways | Protein sequences | Coding RNA sequences | Non-coding RNA sequences | Non-coding RNA biotypes         |
|-----------------|----------|-------------------|----------------------|--------------------------|---------------------------------|
| <b>NCI-PID</b>  | 224      | 4754              | 5123                 | 8485                     |                                 |
|                 |          |                   |                      | 3858                     | <i>Processed transcript</i>     |
|                 |          |                   |                      | 3556                     | <i>Retained intron</i>          |
|                 |          |                   |                      | 1071                     | <i>Non-sense mediated decay</i> |
| <b>Reactome</b> | 167      | 10376             | 11304                | 17189                    |                                 |
|                 |          |                   |                      | 7946                     | <i>Processed transcript</i>     |
|                 |          |                   |                      | 6780                     | <i>Retained intron</i>          |
|                 |          |                   |                      | 2463                     | <i>Non-sense mediated decay</i> |

**Supplementary Table 1.** Number of protein and transcript sequences in the Reactome and NCI-PID pathways. The statistics on coding and non-coding transcripts are reported separately. Non-coding RNA biotypes were collected from the Ensembl database.

| Reactome pathway name                                            | ES          | NES         | P-value     | Q-value            |
|------------------------------------------------------------------|-------------|-------------|-------------|--------------------|
| <i>Enriched</i>                                                  |             |             |             |                    |
| <b>Amyloids</b>                                                  | <b>0.50</b> | <b>1.59</b> | <b>0</b>    | <b>0.003230039</b> |
| Base Excision Repair                                             | 0.49        | 1.59        | 0           | 0.003798912        |
| Amine compound SLC transporters                                  | 0.51        | 1.61        | 0           | 0.004434586        |
| Metabolism of nitric oxide                                       | 0.52        | 1.61        | 0           | 0.006178905        |
| Signal regulatory protein (SIRP) family interactions             | 0.51        | 1.63        | 0           | 0.010448562        |
| Botulinum neurotoxicity                                          | 0.47        | 1.49        | 0           | 0.011695406        |
| Elongation arrest and recovery                                   | 0.47        | 1.48        | 0           | 0.01314011         |
| Latent infection of Homo sapiens with Mycobacterium tuberculosis | 0.45        | 1.46        | 0           | 0.015884457        |
| ABC-family proteins mediated transport                           | 0.46        | 1.43        | 0.002       | 0.021284832        |
| Iron uptake and transport                                        | 0.43        | 1.37        | 0           | 0.048071492        |
| Transcriptional Regulation of White Adipocyte Differentiation    | 0.42        | 1.35        | 0.001       | 0.050647687        |
| Metabolism of vitamins and cofactors                             | 0.42        | 1.35        | 0           | 0.055165242        |
| Collagen formation                                               | 0.42        | 1.34        | 0.001       | 0.060681045        |
| Viral dsRNA:TLR3:TRIF Complex Activates TBK1/IKK epsilon         | 0.46        | 1.33        | 0.052525252 | 0.063186444        |
| Bile salt and organic anion SLC transporters                     | 0.43        | 1.31        | 0.023046093 | 0.07306761         |
| Platelet homeostasis                                             | 0.39        | 1.28        | 0           | 0.10522428         |
| APC-Cdc20 mediated degradation of Nek2A                          | 0.41        | 1.28        | 0.008008008 | 0.10563387         |
| Amino acid transport across the plasma membrane                  | 0.39        | 1.27        | 0.01        | 0.110434674        |
| Integration of energy metabolism                                 | 0.38        | 1.25        | 0           | 0.11530844         |
| Potassium Channels                                               | 0.39        | 1.26        | 0.003       | 0.11546165         |
| Signaling by BMP                                                 | 0.41        | 1.25        | 0.039       | 0.11587791         |
| Meiosis                                                          | 0.38        | 1.24        | 0.001       | 0.117704734        |
| Smooth Muscle Contraction                                        | 0.38        | 1.24        | 0.001       | 0.12061862         |
| Aquaporin-mediated transport                                     | 0.39        | 1.26        | 0.001       | 0.12108914         |
| Regulatory RNA pathways                                          | 0.40        | 1.24        | 0.056056056 | 0.12158073         |
| Extracellular matrix organization                                | 0.38        | 1.24        | 0.006       | 0.124391645        |
| Meiotic Recombination                                            | 0.38        | 1.21        | 0.032       | 0.17208144         |
| Metabolism of porphyrins                                         | 0.38        | 1.19        | 0.087       | 0.19959927         |
| <i>Depleted</i>                                                  |             |             |             |                    |
| NICD traffics to nucleus                                         | -0.27       | -2.05       | 0           | 0                  |
| RORA Activates Circadian Expression                              | -0.32       | -1.83       | 0           | 0.004366812        |
| Regulation of beta-cell development                              | -0.24       | -1.57       | 0           | 0.01746725         |
| Organic anion transporters                                       | -0.39       | -1.40       | 0.05154639  | 0.024745269        |

**Supplementary Table 2.** Gene set enrichment analysis of autogenous interactions in Reactome pathways.

For each pathway we report: enrichment score (ES), Normalized enrichment score (NES), the nominal p-value (P-value), and the adjusted P-value (Q-value). The table lists enriched and depleted pathways with a False Discovery Rate (FDR) < 20%.

|                 | NCI-PID pathway name                                                        | ES          | NES         | P-value     | Q-value           |
|-----------------|-----------------------------------------------------------------------------|-------------|-------------|-------------|-------------------|
| <i>Enriched</i> |                                                                             |             |             |             |                   |
|                 | Signaling events mediated by HDAC Class III                                 | 0.50        | 1.57        | 0           | 0.029423453       |
|                 | C-MYC pathway                                                               | 0.51        | 1.62        | 0           | 0.030875338       |
|                 | Hypoxic and oxygen homeostasis regulation of HIF-1-alpha                    | 0.47        | 1.50        | 0           | 0.031121688       |
|                 | Sphingosine 1-phosphate (S1P) pathway                                       | 0.51        | 1.48        | 0.006085193 | 0.03530931        |
|                 | Effects of Botulinum toxin                                                  | 0.48        | 1.44        | 0.005005005 | 0.035695974       |
|                 | Arf6 trafficking events                                                     | 0.45        | 1.45        | 0           | 0.03624375        |
|                 | PDGF receptor signaling network                                             | 0.50        | 1.46        | 0.009164969 | 0.03697721        |
|                 | Atypical NF-kappaB pathway                                                  | 0.44        | 1.39        | 0           | 0.039326284       |
|                 | S1P5 pathway                                                                | 0.52        | 1.51        | 0.003030303 | 0.039570443       |
|                 | E-cadherin signaling in the nascent adherens junction                       | 0.44        | 1.40        | 0           | 0.039729886       |
|                 | Posttranslational regulation of adherens junction stability and disassembly | 0.43        | 1.39        | 0           | 0.040995207       |
|                 | <b>Alpha-synuclein signaling</b>                                            | <b>0.44</b> | <b>1.41</b> | <b>0</b>    | <b>0.04292989</b> |
|                 | Calcium signaling in the CD4+ TCR pathway                                   | 0.44        | 1.41        | 0           | 0.047486212       |
|                 | EGF receptor (ErbB1) signaling pathway                                      | 0.42        | 1.36        | 0           | 0.057327013       |
|                 | S1P4 pathway                                                                | 0.44        | 1.34        | 0.02        | 0.06289986        |
|                 | Syndecan-4-mediated signaling events                                        | 0.42        | 1.33        | 0.004       | 0.068733335       |
|                 | Regulation of cytoplasmic and nuclear SMAD2/3 signaling                     | 0.43        | 1.32        | 0.007       | 0.07127475        |
|                 | Plasma membrane estrogen receptor signaling                                 | 0.42        | 1.31        | 0.001       | 0.078085385       |
|                 | Regulation of Ras family activation                                         | 0.40        | 1.28        | 0.002       | 0.08190428        |
|                 | Visual signal transduction: Cones                                           | 0.44        | 1.30        | 0.042424243 | 0.082054295       |
|                 | IGF1 pathway                                                                | 0.40        | 1.30        | 0           | 0.08228388        |
|                 | Insulin-mediated glucose transport                                          | 0.40        | 1.28        | 0.005       | 0.084385656       |
|                 | ALK1 signaling events                                                       | 0.41        | 1.30        | 0.004       | 0.08567474        |
|                 | Class IB PI3K non-lipid kinase events                                       | 0.54        | 1.28        | 0.1474501   | 0.08644842        |
|                 | IL2 signaling events mediated by PI3K                                       | 0.40        | 1.29        | 0.001       | 0.08652738        |
|                 | Neurotrophic factor-mediated Trk receptor signaling                         | 0.40        | 1.28        | 0           | 0.08719759        |
|                 | Signaling mediated by p38-gamma and p38-delta                               | 0.43        | 1.28        | 0.052208837 | 0.088682145       |
|                 | EPHB forward signaling                                                      | 0.39        | 1.26        | 0           | 0.1028278         |
|                 | Role of Calcineurin-dependent NFAT signaling in lymphocytes                 | 0.38        | 1.24        | 0           | 0.12479513        |
|                 | EPO signaling pathway                                                       | 0.39        | 1.24        | 0.006       | 0.12763505        |
|                 | Validated nuclear estrogen receptor alpha network                           | 0.39        | 1.23        | 0.005       | 0.1302045         |
|                 | amb2 Integrin signaling                                                     | 0.38        | 1.23        | 0.001       | 0.13506135        |
|                 | N-cadherin signaling events                                                 | 0.38        | 1.23        | 0.004       | 0.13909608        |
|                 | EGFR-dependent Endothelin signaling events                                  | 0.40        | 1.22        | 0.0960961   | 0.13963063        |
|                 | Canonical Wnt signaling pathway                                             | 0.40        | 1.22        | 0.076       | 0.14261521        |
|                 | Visual signal transduction: Rods                                            | 0.40        | 1.22        | 0.084084086 | 0.14717865        |
|                 | Signaling events mediated by Stem cell factor receptor (c-Kit)              | 0.37        | 1.21        | 0.004       | 0.16281918        |
|                 | Canonical NF-kappaB pathway                                                 | 0.38        | 1.20        | 0.038       | 0.17255558        |
|                 | PAR4-mediated thrombin signaling events                                     | 0.43        | 1.19        | 0.22910216  | 0.19042686        |
|                 | Thromboxane A2 receptor signaling                                           | 0.37        | 1.19        | 0.011       | 0.19336416        |
| <i>Depleted</i> |                                                                             |             |             |             |                   |
|                 | EphrinA-EPHA pathway                                                        | -0.37       | -1.10       | 0.28275862  | 0.11127982        |
|                 | LPA4-mediated signaling events                                              | -0.18       | -1.05       | 0.125       | 0.11279825        |

**Supplementary Table 3.** Gene set enrichment analysis of autogenous interactions in NCI-PID pathways. For each pathway we report: enrichment score (ES), Normalized enrichment score (NES), the nominal p-value (P-value), and the adjusted p-value (Q-value). The table lists enriched and depleted pathways with a False Discovery Rate (FDR) < 20%.

|                                 |                                 |
|---------------------------------|---------------------------------|
| ENSP00000013034-ENST00000393196 | ENSP00000341625-ENST00000340533 |
| ENSP00000044462-ENST00000413382 | ENSP00000346045-ENST00000330339 |
| ENSP00000202773-ENST00000202773 | ENSP00000347271-ENST00000326199 |
| ENSP00000202773-ENST00000424576 | ENSP00000347271-ENST00000344700 |
| ENSP00000207437-ENST00000207437 | ENSP00000348918-ENST00000356524 |
| ENSP00000222247-ENST00000222247 | ENSP00000349467-ENST00000447653 |
| ENSP00000230050-ENST00000230050 | ENSP00000355778-ENST00000366815 |
| ENSP00000233813-ENST00000449583 | ENSP00000356859-ENST00000367886 |
| ENSP00000237500-ENST00000400175 | ENSP00000359910-ENST00000370861 |
| ENSP00000237530-ENST00000373632 | ENSP00000359910-ENST00000370873 |
| ENSP00000242577-ENST00000242577 | ENSP00000366124-ENST00000398409 |
| ENSP00000242577-ENST00000392508 | ENSP00000372126-ENST00000382692 |
| ENSP00000246554-ENST00000246554 | ENSP00000380156-ENST00000273223 |
| ENSP00000251453-ENST00000251453 | ENSP00000386717-ENST00000409028 |
| ENSP00000251453-ENST00000339471 | ENSP00000386717-ENST00000409320 |
| ENSP00000252543-ENST00000394580 | ENSP00000386717-ENST00000409733 |
| ENSP00000253452-ENST00000253452 | ENSP00000391944-ENST00000317198 |
| ENSP00000256682-ENST00000447318 | ENSP00000419425-ENST00000355968 |
| ENSP00000267884-ENST00000267884 | ENSP00000203407-ENST00000415995 |
| ENSP00000267996-ENST00000403994 | ENSP00000229239-ENST00000474249 |
| ENSP00000270142-ENST00000389995 | ENSP00000251595-ENST00000482565 |
| ENSP00000272317-ENST00000402285 | ENSP00000272298-ENST00000484408 |
| ENSP00000287038-ENST00000287038 | ENSP00000305260-ENST00000470354 |
| ENSP00000294189-ENST00000492277 | ENSP00000307889-ENST00000399461 |
| ENSP00000296417-ENST00000296417 | ENSP00000307889-ENST00000484610 |
| ENSP00000301587-ENST00000344546 | ENSP00000307889-ENST00000491523 |
| ENSP00000307786-ENST00000409409 | ENSP00000322421-ENST00000472694 |
| ENSP00000307889-ENST00000467736 | ENSP00000327801-ENST00000473021 |
| ENSP00000310275-ENST00000445560 | ENSP00000327801-ENST00000476482 |
| ENSP00000311028-ENST00000312037 | ENSP00000327801-ENST00000478034 |
| ENSP00000311028-ENST00000407193 | ENSP00000341625-ENST00000494131 |
| ENSP00000322419-ENST00000321153 | ENSP00000345156-ENST00000479563 |
| ENSP00000322421-ENST00000320868 | ENSP00000345344-ENST00000482054 |
| ENSP00000325905-ENST00000446327 | ENSP00000346088-ENST00000471204 |
| ENSP00000326031-ENST00000358239 | ENSP00000349142-ENST00000460820 |
| ENSP00000333994-ENST00000335295 | ENSP00000363018-ENST00000467020 |
| ENSP00000338345-ENST00000336904 | ENSP00000363018-ENST00000490335 |
| ENSP00000338345-ENST00000345009 | ENSP00000381607-ENST00000464930 |
| ENSP00000339095-ENST00000406376 | ENSP00000386717-ENST00000419276 |
| ENSP00000341625-ENST00000299438 |                                 |

**Supplementary Table 4.** *Protein-RNA interactions associated with low translation efficiency.* All the protein-RNA pairs showing an interaction propensity > 50, [protein]/[RNA] < 1 and protein abundance higher than 100 ppm are here reported. The high protein interaction propensity and poor translation efficiency indicates that a feedback loop mechanism is likely to occur in these cases.

## Supplementary Figures

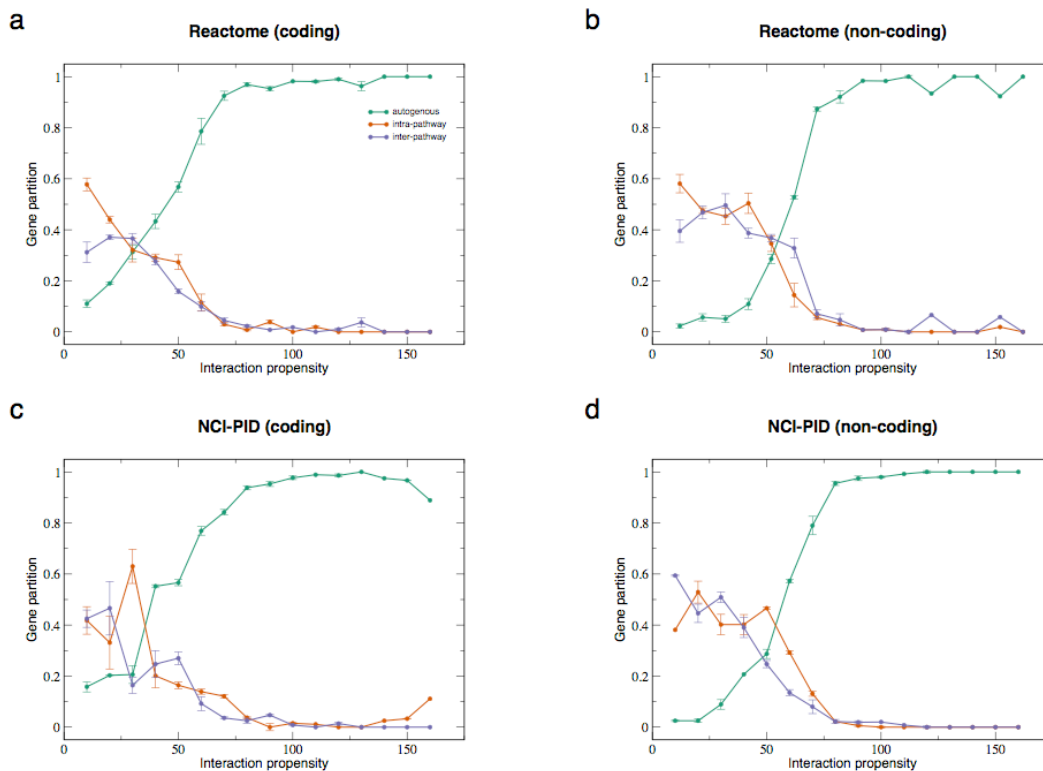

**Supplementary Figure 1.** *Autogenous associations are significantly enriched with respect to intra- and inter-pathway interactions in Reactome and NCI-PID databases. This observation is valid for both coding (panel a for Reactome and panel c for NCI-PID pathways) and non-coding transcripts (panel b for Reactome and panel d for NCI-PID pathways). Autogenous, intra- and inter-pathway associations are represented with green, orange and blue lines, respectively. Note that panel a is the same as Figure 1b in the main text (mean and s.e.m. of bins are shown).*

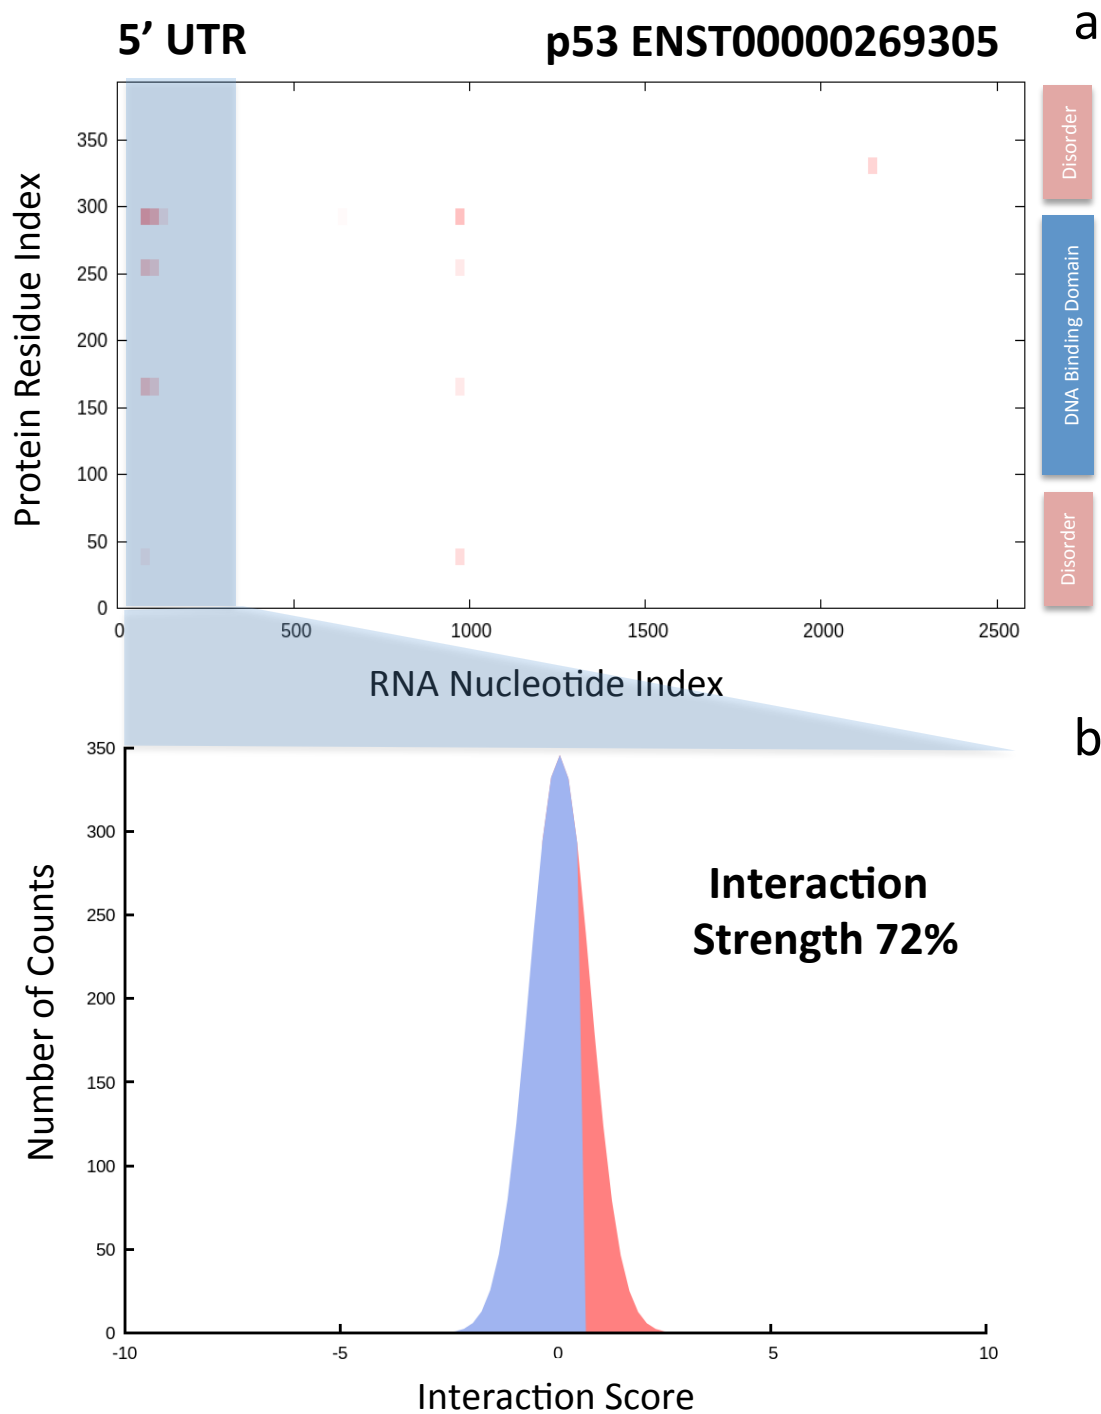

**Supplementary Figure 2.** *The autogenous interaction of p53.* a) In agreement with preliminary evidence, we predicted that human p53 interacts with its own transcript (ENST00000269305) at the 5' UTR. Notably, other regions in the coding sequence show propensity to interact with the mRNA, as shown in murine experiments. b) The interaction between the 5' UTR and p53 is strong (72%) with respect to a pool of random protein-RNA associations.

## Synaptotagmin I chr12:78135414-78368973 a

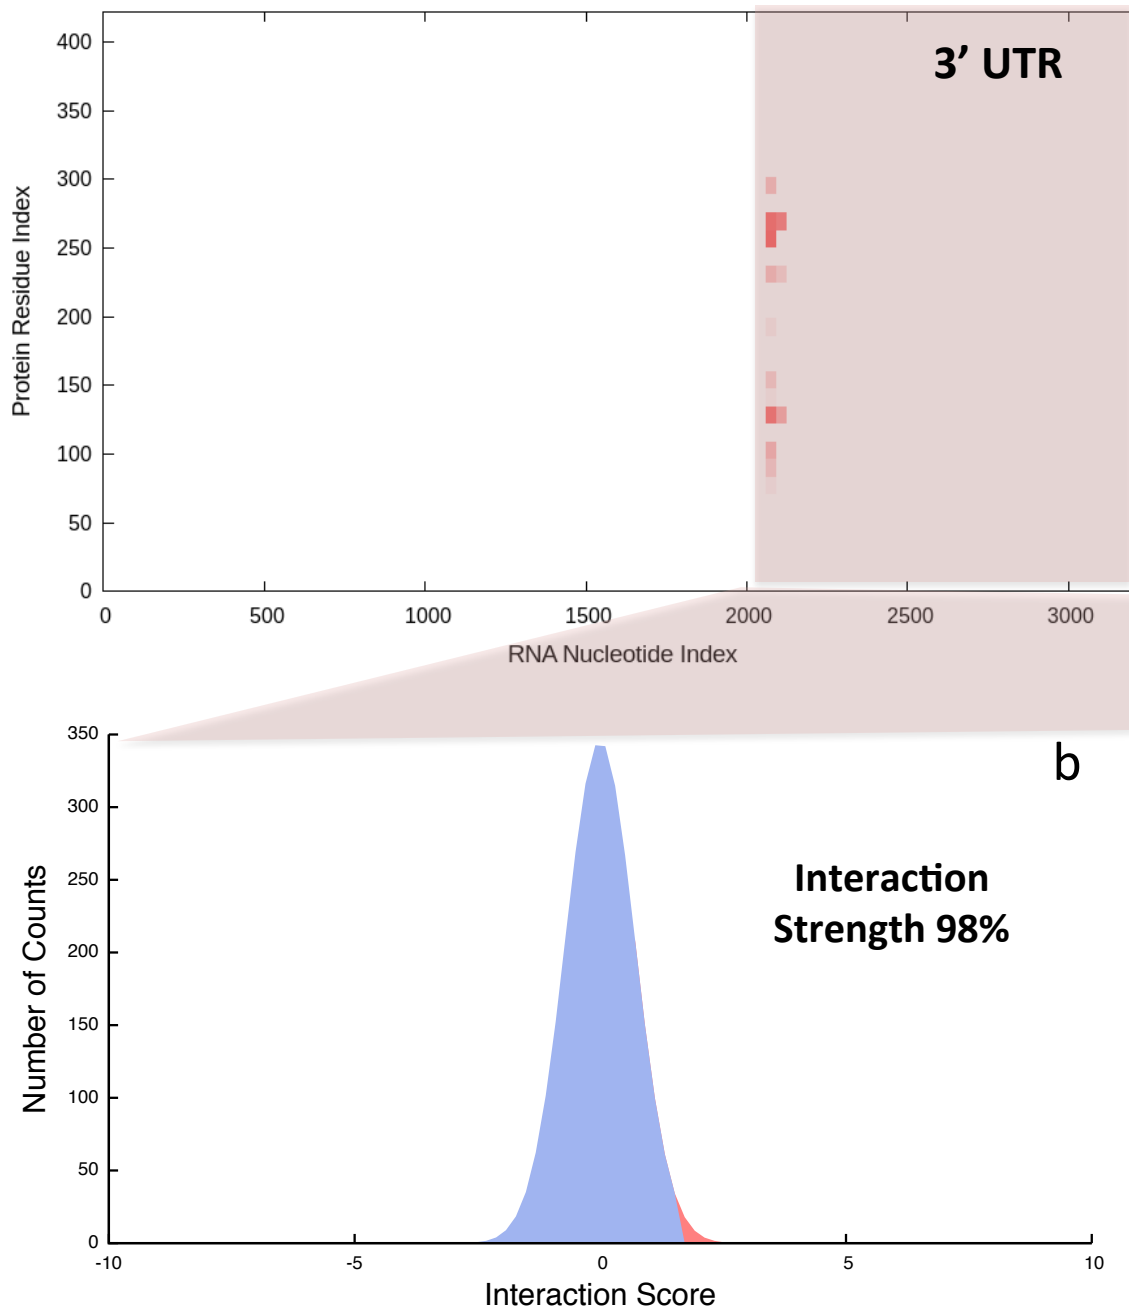

**Supplementary Figure 3.** *The autogenous interaction of human synaptotagmin-1.* a) In agreement with previous evidence, we predicted that human synaptotagmin-1 interacts with its own mRNA (chr12:78135414-78368973 of NCBI36/hg18) at the 3' UTR. b) The interaction between the 3' UTR and synaptotagmin-1 is strong (98%) with respect a pool of random protein-RNA associations, which indicates high specificity.



**Thymidylate Synthase  
ENST00000323274**

**a**

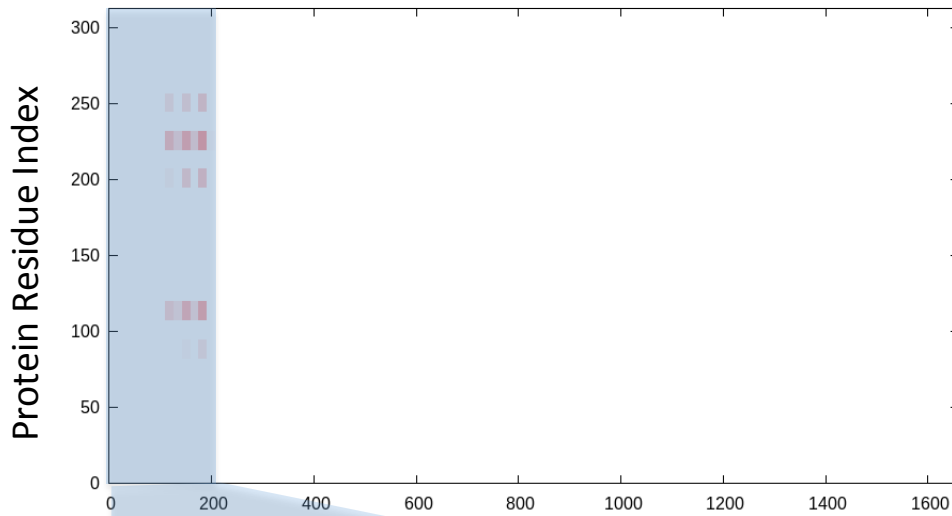

**b**

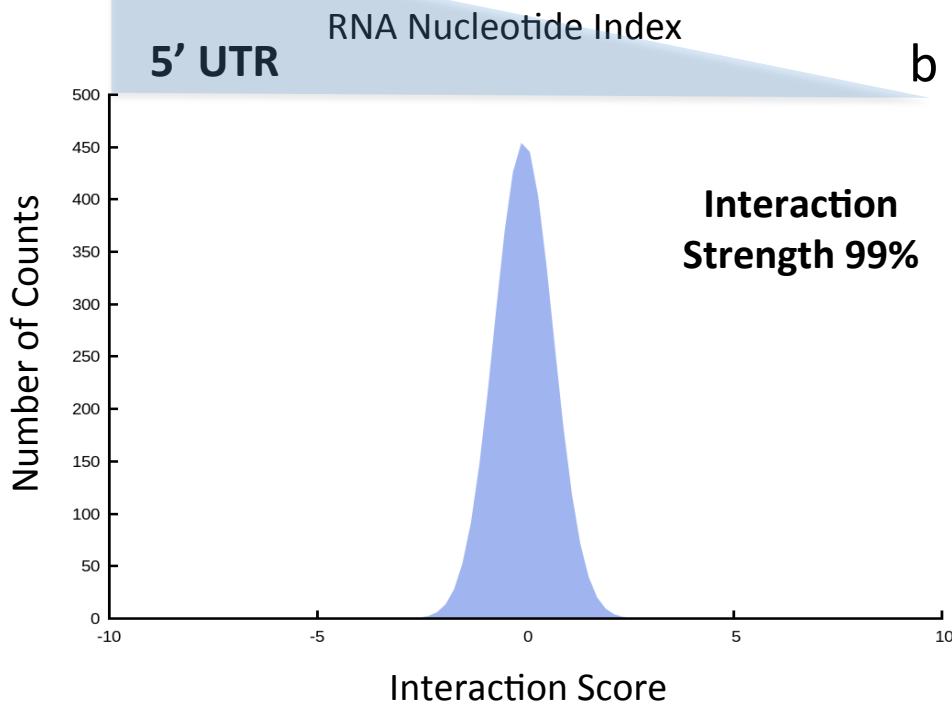

**Supplementary Figure 4.** *The autogenous interaction of human thymidylate synthase.* a) We predicted that human thymidylate synthase interacts with its own mRNA (ENST00000323274) at the 5' UTR, as shown in previous experiments. b) The interaction between the 5' UTR and thymidylate synthase is strong (99%) with respect a pool of random protein-RNA associations.

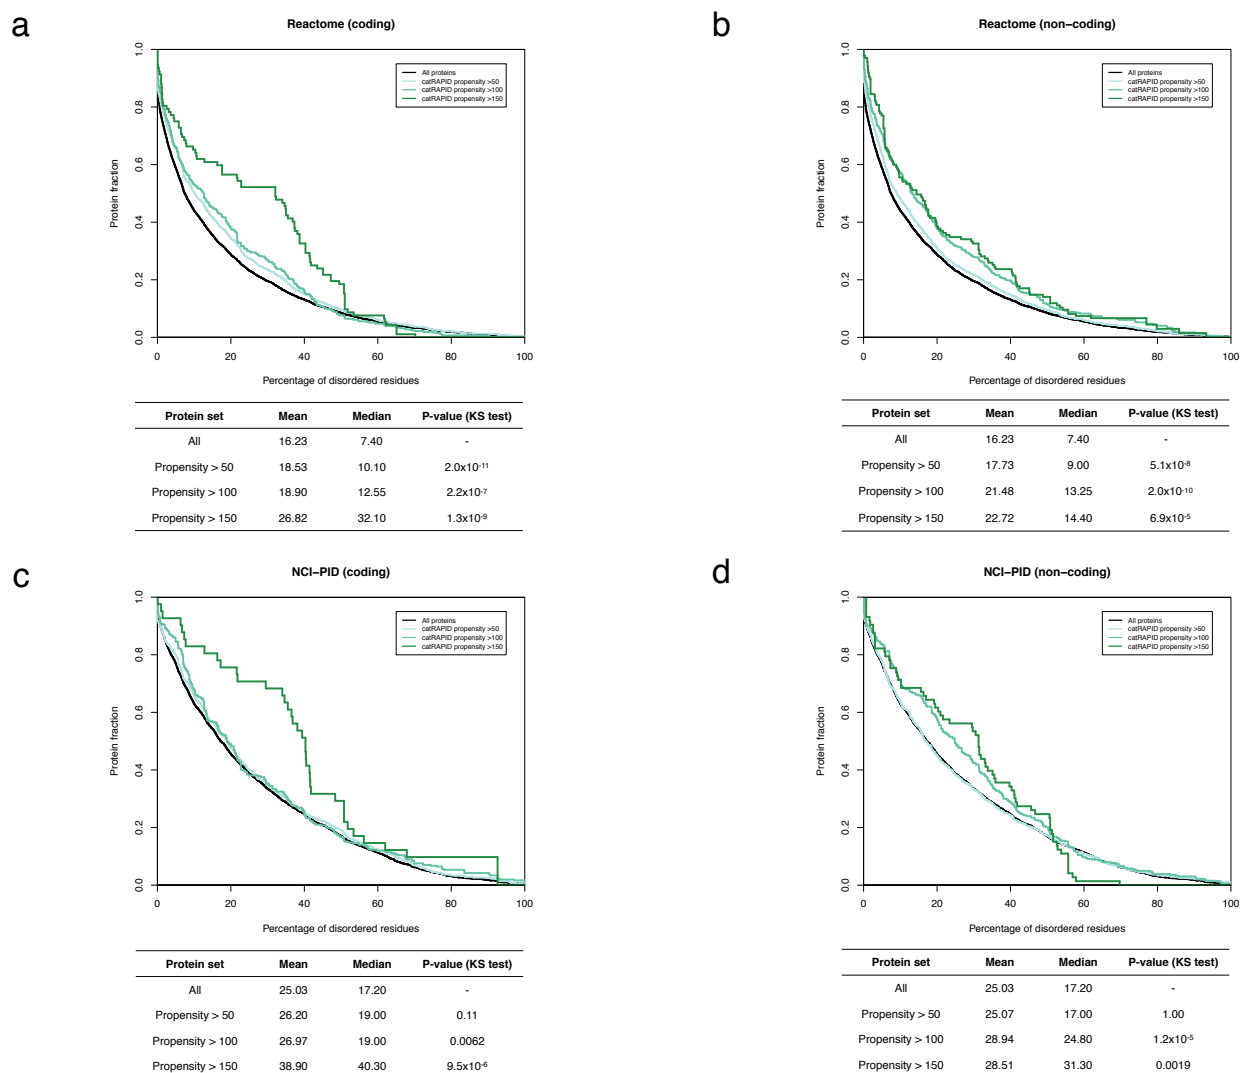

**Supplementary Figure 5. Structural disorder in proteins involved in autogenous interactions in Reactome and NCI-PID pathways.** We observe an increase in disordered propensity from low to high protein-RNA interaction propensities (black line represents reference baseline) when considering interactions with either coding (panel a for Reactome and panel c for NCI-PID) or non-coding transcripts (panel b for Reactome and panel d for NCI-PID). We report the average and median values for all the proteins in each pathway database. The statistical significance was assessed with Kolmogorov–Smirnov test (KS test). Note that only at the lowest interaction propensity threshold (i.e. 50), the disorder propensity of NCI-PID proteins is not significantly different from the reference.

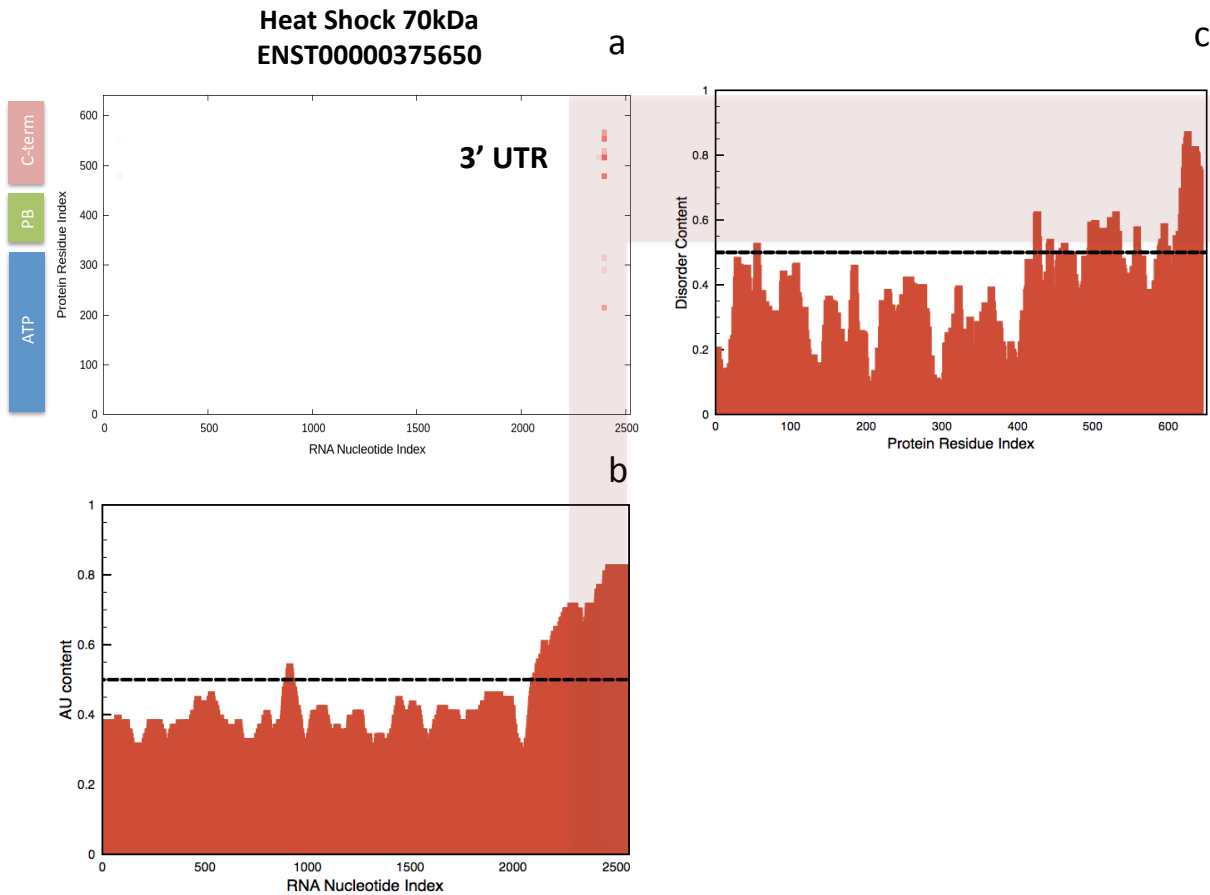

**Supplementary Figure 6.** *The autogenous interaction of Human Heat Shock 70kDa (HSP70).* a) In agreement with previous observations, we predicted that HSP70 interacts with its own mRNA (ENST00000375650) at the 3' UTR. b) HSP70 has a strong tendency to bind to AU-rich elements that accumulate at the 3' UTR. c) The N-terminal ATP domain is involved in the binding together with the disordered C-terminus, which is consistent with the fact that HSP70 RNA-binding affinity depends on the ATP domain but it is considerably reduced when the disordered region is removed (the disorder content was estimated with IUPred). Protein domains and disordered regions were taken from a recent study.

## U1 snRNP-specific U1A ENST00000243563

a

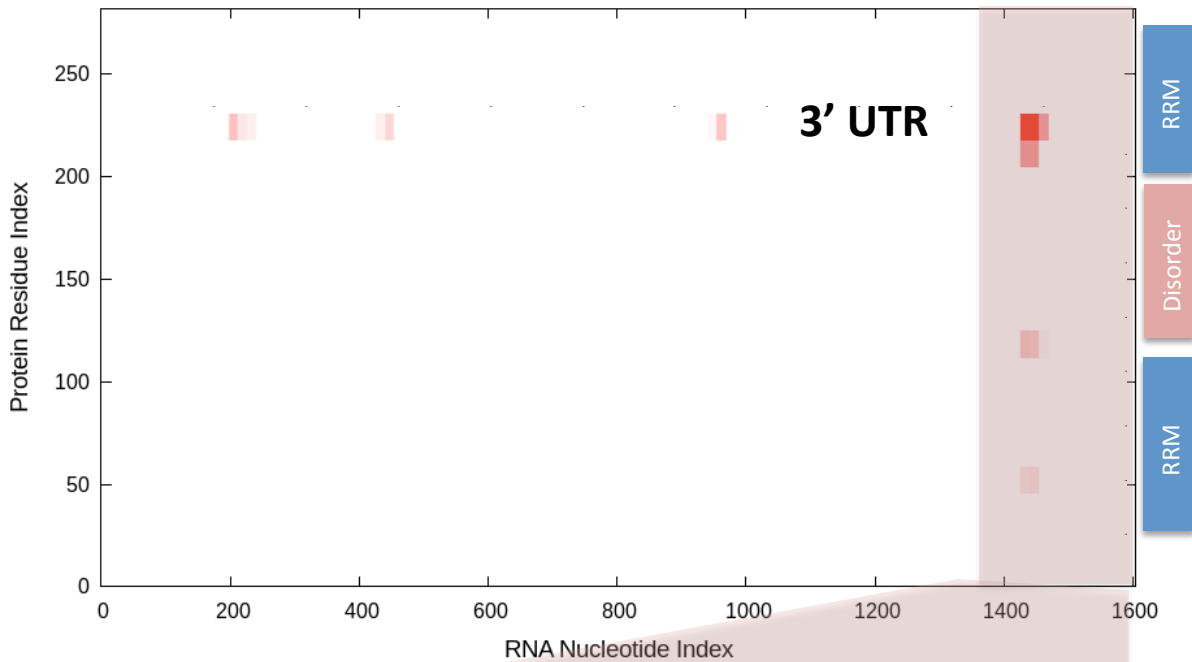

b

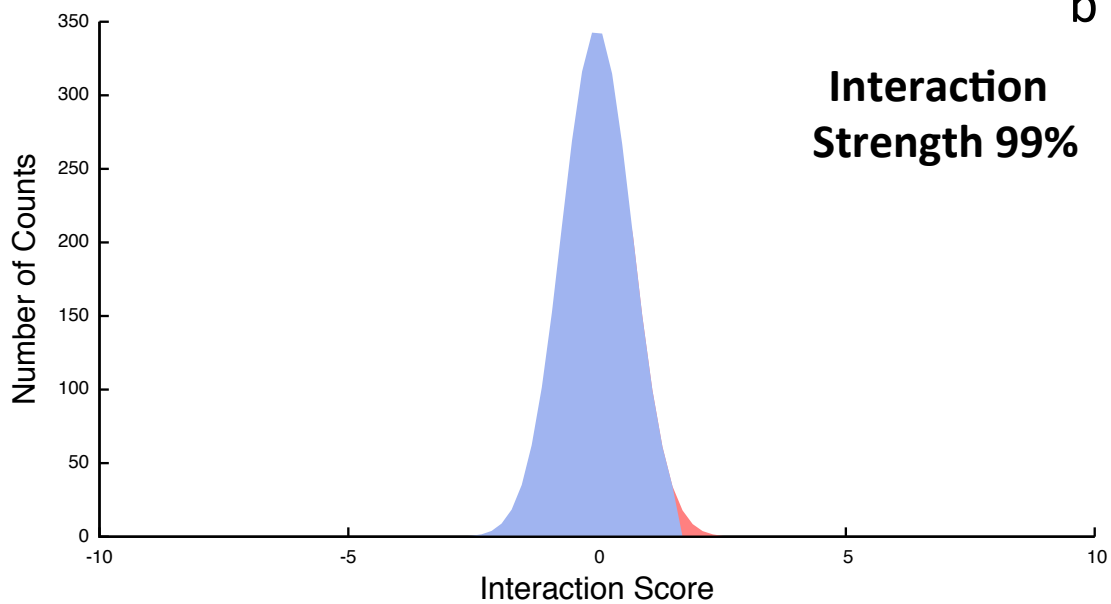

**Supplementary Figure 7.** *The autogenous interaction of human small nuclear RiboNucleic Particle-specific (snRNP) U1A.* a) In agreement with experimental evidence, we predicted that U1A synthase interacts with its own mRNA (ENST00000243563) at the 3' UTR. b) The interaction between the 3' UTR and U1A is strong (99%) with respect a pool of random protein-RNA associations (Methods), which indicates high specificity. The RNA binding domains and the disordered region are shown as reported in UniprotKB (entry P09012).

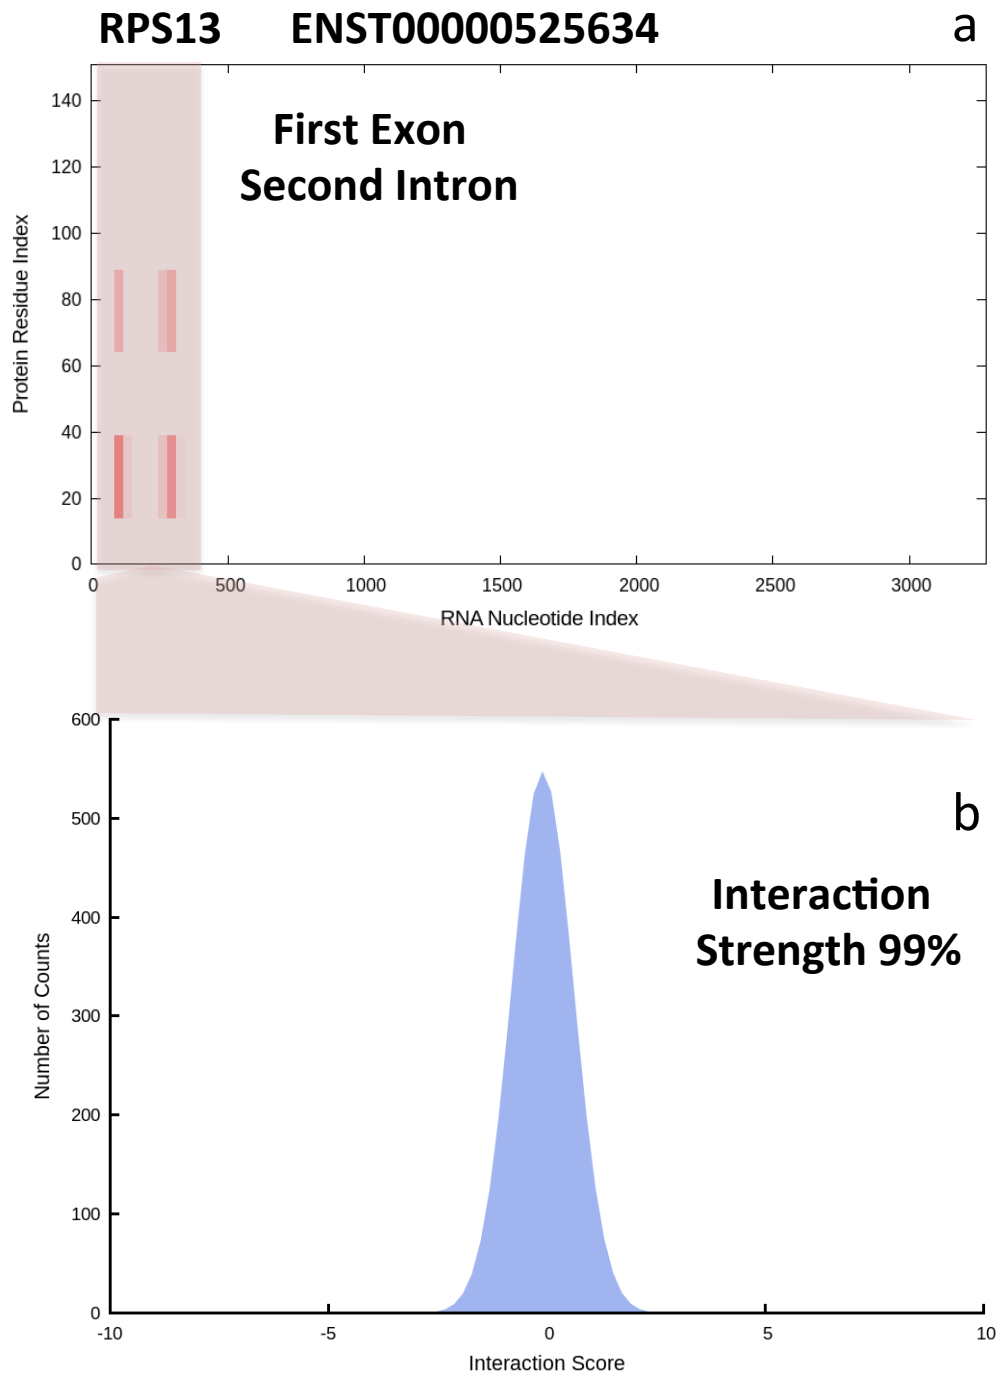

**Supplementary Figure 8.** *The autogenous interaction of human ribosomal protein S13.* a) *catRAPID* identified the binding regions of S13 within the first and second exons (ENST00000525634), in agreement with experimental evidence. b) The interaction between the first and second exons with S13 is strong (99%) with respect a pool of random protein-RNA associations.

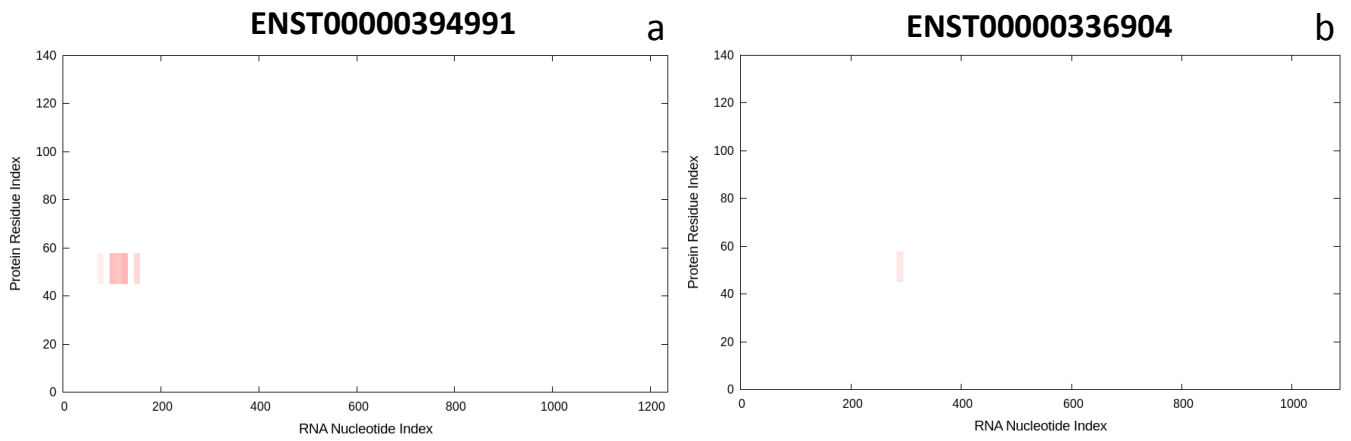

**Supplementary Figure 9.** *Interaction maps of  $\alpha$ -synuclein with transcripts ENST00000394991 and ENST00000336904.* The binding sites were predicted to be in the 5' terminal regions. A lysine-rich region spanning residues 40-60 was predicted by *catRAPID* to be involved in RNA recognition, which is consistent with previous results indicating an anion binding ability of the N-terminus.

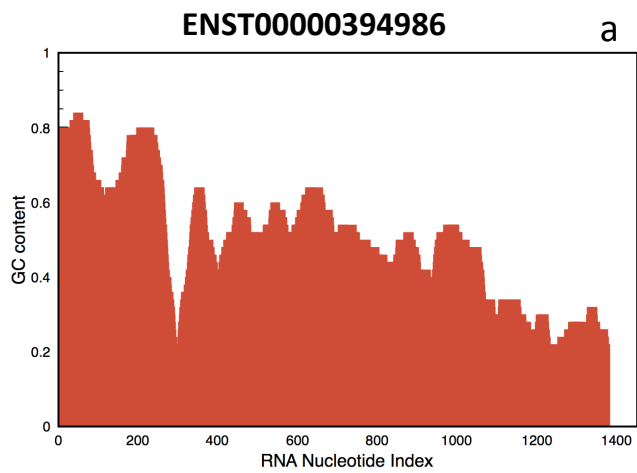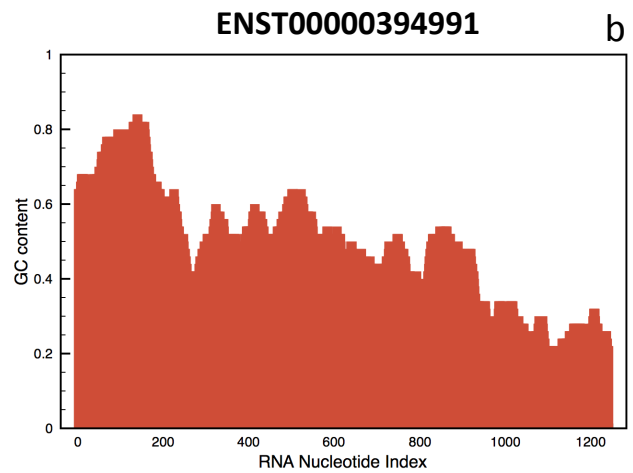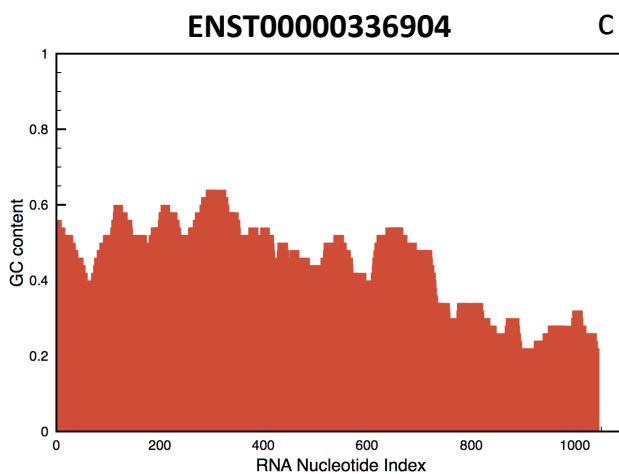

**Supplementary Figure 10.** GC-content of  $\alpha$ -synuclein transcripts *ENST00000394986*, *ENST00000394991* and *ENST00000336904*. The binding sites (Figure 5 and Supplementary Figure 9) were predicted to occur in GC-rich regions. Previous studies have shown that  $\alpha$ -synuclein binds to DNA sequences enriched in GC content.
